# Supplementary material for: Adiposity Mediates the Association between the Dietary Inflammatory Index and Markers of Type 2 Diabetes Risk in Middle-Aged Black South African Women
Source: PubMed Central journal article supplement (PMC6628082; doi:10.3390/nu11061246), 2019-05-31
Supplement: nutrients-11-01246-s001.pdf [file nutrients-11-01246-s001.pdf]

**Supplementary information**

**Table S1.** Demographic, behavioral and lifestyle factors characteristics of the participants.

|                                          | Overall     | Negative E-DII group (n=107) | Positive E-DII group (n=83) | p-value |
|------------------------------------------|-------------|------------------------------|-----------------------------|---------|
| <b>Sociodemographic factors</b>          |             |                              |                             |         |
| Housing density (persons/room)           | 1 (0.7-1.3) | 0.9 (0.6-1.2)                | 1.0 (0.8-1.3)               | 0.12    |
| Asset index (out of 12 items)            | 9 (7-11)    | 9 (7-11)                     | 9 (7-11)                    | 0.87    |
| Household Food insecurity score          | 4 (0-9)     | 3 (0-8)                      | 4 (0-10)                    | 0.21    |
| <b>Marital status</b>                    |             |                              |                             |         |
| Married                                  | 104 (54.7)  | 56 (52.3)                    | 48 (57.8)                   | 0.45    |
| Unmarried                                | 86 (45.3)   | 51 (47.7)                    | 35 (42.2)                   |         |
| <b>Highest level of education, n (%)</b> |             |                              |                             |         |
| Primary education                        | 29 (15.3)   | 16 (15.0)                    | 13 (15.7)                   | 0.22    |
| Some secondary education                 | 89 (46.8)   | 44 (41.1)                    | 45 (54.2)                   |         |
| Secondary education completed (grade 12) | 41 (21.6)   | 28 (26.2)                    | 13 (15.7)                   |         |
| Tertiary education                       | 31 (16.3)   | 19 (17.8)                    | 12 (14.5)                   |         |
| <b>Employment, n (%)</b>                 |             |                              |                             |         |
| Employment                               | 100 (52.6)  | 58 (54.2)                    | 42 (50.6)                   | 0.622   |
| Unemployed                               | 90 (47.4)   | 49 (45.8)                    | 41 (49.4)                   |         |
| <b>Monthly income, n (%)</b>             |             |                              |                             |         |
| 1=No income                              | 1 (0.5)     |                              | 1 (1.2)                     | 0.51    |
| 2=R1-4999                                | 101 (54.0)  | 59 (56.2)                    | 42 (51.2)                   |         |
| 3=R5000-9999                             | 39 (20.9)   | 20 (19.0)                    | 19 (23.2)                   |         |
| 4=R10000-19999                           | 34 (18.2)   | 21 (20.0)                    | 13 (15.9)                   |         |

|                                                       |                        |                        |                        |      |
|-------------------------------------------------------|------------------------|------------------------|------------------------|------|
| 5= (>R20000)                                          | 12 (6.4)               | 5 (4.8)                | 7 (8.5)                |      |
| *3 participants did not disclose their monthly income |                        |                        |                        |      |
| <b>Behavioral and lifestyle factors</b>               |                        |                        |                        |      |
| <b>Smoking status, n (%)</b>                          |                        |                        |                        |      |
| Never smoked                                          | 204 (96.3)             | 104 (97.2)             | 79 (95.2)              | 0.46 |
| Current smoker                                        | 8 (3.7)                | 3 (2.8)                | 4 (4.8)                |      |
| <b>Alcohol intake, n (%)</b>                          |                        |                        |                        |      |
| Yes                                                   | 49 (25.8)              | 24 (22.4)              | 25 (30.1)              | 0.23 |
| No/Never                                              | 141 (74.2)             | 83 (77.6)              | 58 (69.9)              |      |
| <b>Physical activity data</b>                         |                        |                        |                        |      |
| Light (hr/d)                                          | 6.4 (5.4-7.4)          | 6.6 (5.5-5.2)          | 6.1 (5.2-7.2)          | 0.14 |
| Moderate (mins/d)                                     | 37.4 (21.4-51.9)       | 41.5 (21.5-50.8)       | 33.7 (18.7-52.8)       | 0.31 |
| Vigorous (mins/d)                                     | 0.1 (0.0-0.5)          | 0.2 (0.0-0.6)          | 0.0 (0.0-0.3)          | 0.19 |
| Total MVPA (mins/d)                                   | 37.9 (21.6-53.2)       | 43.8 (21.7-53.0)       | 33.7 (18.7-53.5)       | 0.23 |
| MVPA (% per day)                                      | 4.3 (2.3-5.9)          | 4.9 (2.4-6.0)          | 3.7 (2.2-5.7)          | 0.25 |
| Steps per day                                         | 6590.4 (4871.7-8583.7) | 6945.7 (5063.9-8736.1) | 6203.0 (4792.8-8249.0) | 0.12 |
| <b>Sedentary behavior</b>                             |                        |                        |                        |      |
| Sedentary (hr/d)                                      | 8.5 ± 2.2              | 8.5 ± 2.3              | 8.4 ± 2.0              | 0.69 |
| Sedentary (% per day)                                 | 50.8 ± 12.9            | 50.8 ± 13.7            | 50.9 ± 11.8            | 0.99 |
| Standing (% per day)                                  | 36.9 ± 10.6            | 36.6 ± 11.4            | 37.2 ± 9.4             | 0.70 |
| Stepping (% per day)                                  | 12.3 ± 4.2             | 12.6 ± 4.3             | 11.9 ± 4.0             | 0.31 |

Data presented as means ± SD, median (25<sup>th</sup>-75<sup>th</sup> percentiles) or frequency (%). E-DII, energy-adjusted dietary inflammatory index; MVPA, moderate-vigorous physical activity.

**Table S2.** Nutrient intake between the positive and negative E-DII score groups.

|                                        |                        | Negative E-DII group<br>(n=107) | Positive E-DII group<br>(n=83) | p-value     |
|----------------------------------------|------------------------|---------------------------------|--------------------------------|-------------|
| Number (%)                             | <b>Overall</b>         | <b>107 (56.3%)</b>              | <b>83(43.7%)</b>               |             |
| Energy (kcal/d)                        | 1464.8 (1115.0-1959.1) | 1461.9 (1115.0-1962.1)          | 1490.3 (1111.1-1905.9)         | 0.66        |
| Protein (g/d)                          | 36.6 (28.7-52.5)       | 38.8 (29.4-57.7)                | 34.9 (26.8-46.8)               | 0.03        |
| Protein (%E)                           | 10.2 (8.5-12.6)        | 11.1 (9.4-13.0)                 | 9.2 (7.8-10.8)                 | <0.0001     |
| Total fat (g/d)                        | 60.5 (45.4-85.9)       | 58.2 (41.5-79.6)                | 71.8 (52.5-99.1)               | 0.004       |
| Total fat (%E)                         | 38.1 (32.2-43.9)       | 35.3 (29.9-39.9)                | 42.4 (36.5-48.4)               | <0.0001     |
| Saturated fat (g/d)                    | 14.2 (11.0-20.8)       | 13.2 (9.9-19.2)                 | 17.1 (11.7-22.5)               | 0.007       |
| Saturated fat (%E)                     | 8.9 (7.6-10.4)         | 8.2 (7.3-9.5)                   | 10.0 (8.6-11.3)                | <0.0001     |
| Monounsaturated fatty acid (g/d)       | 20.4 (14.7-29.8)       | 19.6 (13.6-27.2)                | 21.8 (15.7-33.9)               | 0.03        |
| Monounsaturated fatty acid (%E)        | 12.6 (10.3-14.9)       | 11.9 (9.9-13.9)                 | 13.6 (11.3-15.8)               | 0.001       |
| Polyunsaturated fatty acid (g/d)       | 22.6 (14.7-30.7)       | 18.8 (12.0-28.4)                | 24.4 (17.7-34.2)               | 0.002       |
| Polyunsaturated fatty acid (%E)        | 12.6 (8.8-16.9)        | 11.0 (8.4-14.4)                 | 15.8 (10.3-19.0)               | 0.0001      |
| Carbohydrates (g/d)                    | 181.4 (135.6-247.3)    | 194.0 (142.5-256.9)             | 168.6 (125.6-239.4)            | 0.18        |
| Carbohydrates (%E)                     | 50.8 (45.5-56.7)       | 52.3 (48.1-58.3)                | 47.0 (41.4-54.0)               | <0.0001     |
| Alcohol                                | 0.0 (0.0-0.0)          | 0.0 (0.0-0.0)                   | 0.0 (0.0-0.0)                  | 0.14        |
| Cholesterol (mg)                       | 132.3 (83.8-217.0)     | 132.6 (85.7-208.1)              | 132.1 (80.5-240.9)             | 0.89        |
| Fiber (g/d)                            | 12.0 (8.4-17.3)        | 14.5 (10.4-20.1)                | 9.2 (7.0-13.1)                 | <0.0001     |
| Iron (mg/d)                            | 8.5 (6.3-12.1)         | 9.7 (7.0-13.7)                  | 7.8 (5.7-10.2)                 | 0.005       |
| Magnesium (mg/d)                       | 159.4 (118.2-210.0)    | 175.7 (129.2-250.8)             | 136.3 (105.2-200.4)            | 0.002       |
| Zinc (mg/d)                            | 6.5 (5.0-9.0)          | 7.43 (5.7-10.3)                 | 6.0 (4.3-7.5)                  | <0.0001)    |
| Vitamin A (Retinol equivalent ) (µg/d) | 617.9 (354.7-1007.8)   | 664.0 (393.8-1039.9)            | 590.5 (300.4-1007.8)           | 0.21        |
| Thiamine (mg/d)                        | 1.0 (0.8-1.5)          | 1.1 (0.8-1.6)                   | 1.0 (0.7-1.3)                  | <b>0.03</b> |
| Ribloflavin (mg/d)                     | 0.8 (0.6-1.1)          | 0.7 (0.6-1.2)                   | 0.8 (0.5-1.1)                  | 0.57        |
| Niacin (mg/d)                          | 13.0 (9.8-18.2)        | 15.0 (10.9-21.0)                | 10.8 (8.5-15.5)                | <0.0001     |
| Vitamin B6 (mg/d)                      | 1.8 (1.3-2.8)          | 2.0 (1.5-3.4)                   | 1.4 (1.0-2.2)                  | <0.0001     |
| Vitamin B12                            | 1.9 (1.2-3.5)          | 2.0 (1.2-3.3)                   | 1.9 (1.2-3.7)                  | 0.78        |
| Vitamin C (mg/d)                       | 29.9 (15.7-65.3)       | 38.6 (17.2-69.6)                | 23.5 (12.9-53.0)               | 0.009       |
| Vitamin D (µg/d)                       | 3.9 (2.5-5.4)          | 3.8 (2.2-5.3)                   | 4.1 (3.0-5.6)                  | 0.22        |
| Vitamin E (mg/d)                       | 13.4 (8.0-20.5)        | 11.8 (6.9-18.5)                 | 14.7 (10.8-24.3)               | 0.008       |

Values expressed as median (25<sup>th</sup>-75<sup>th</sup> percentiles).
